# Supplementary figures and images for: Non-catalytic motor domains enable processive movement and functional diversification of the kinesin-14 Kar3
Source: eLife journal article supplement (doi:10.7554/elife.04489), 2015-01-27

Figure 2 - figure supplement 1

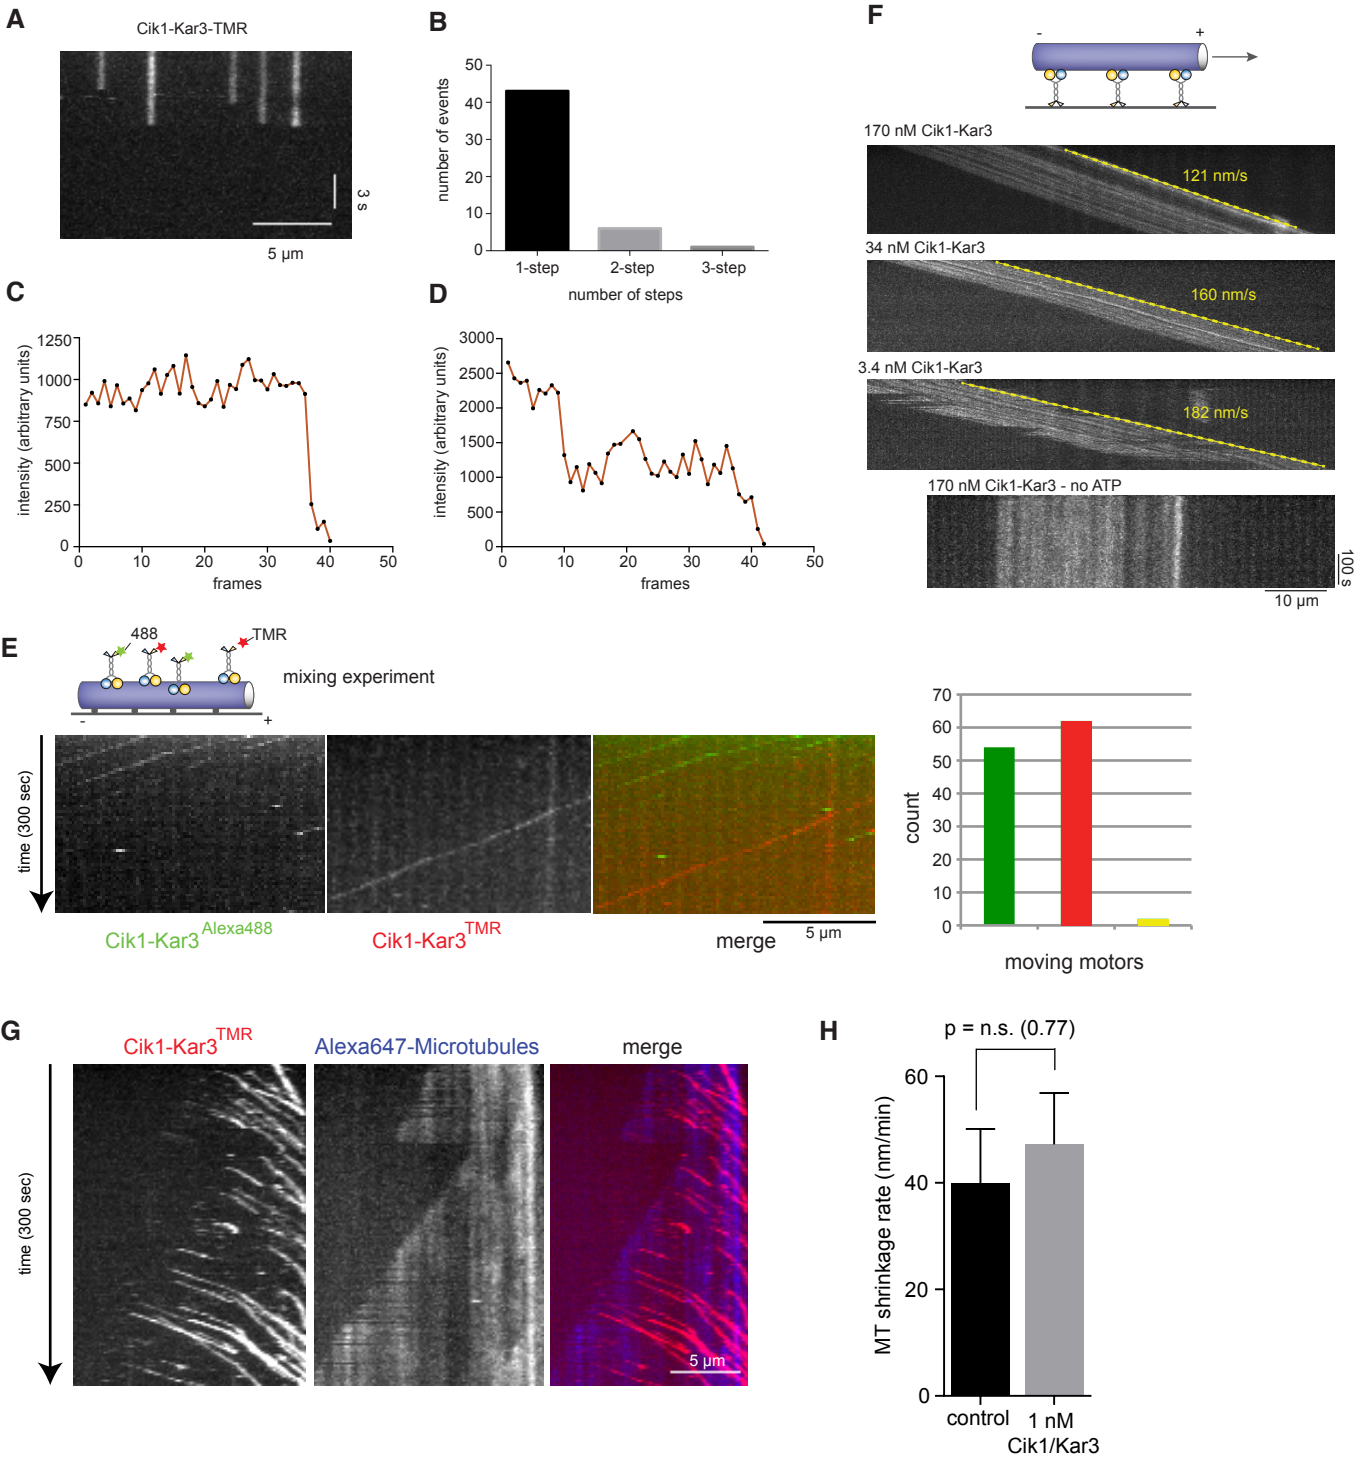

Supplement: supp [file elife-04489-supp-v1.zip]

**Figure 6 - figure supplement 1**

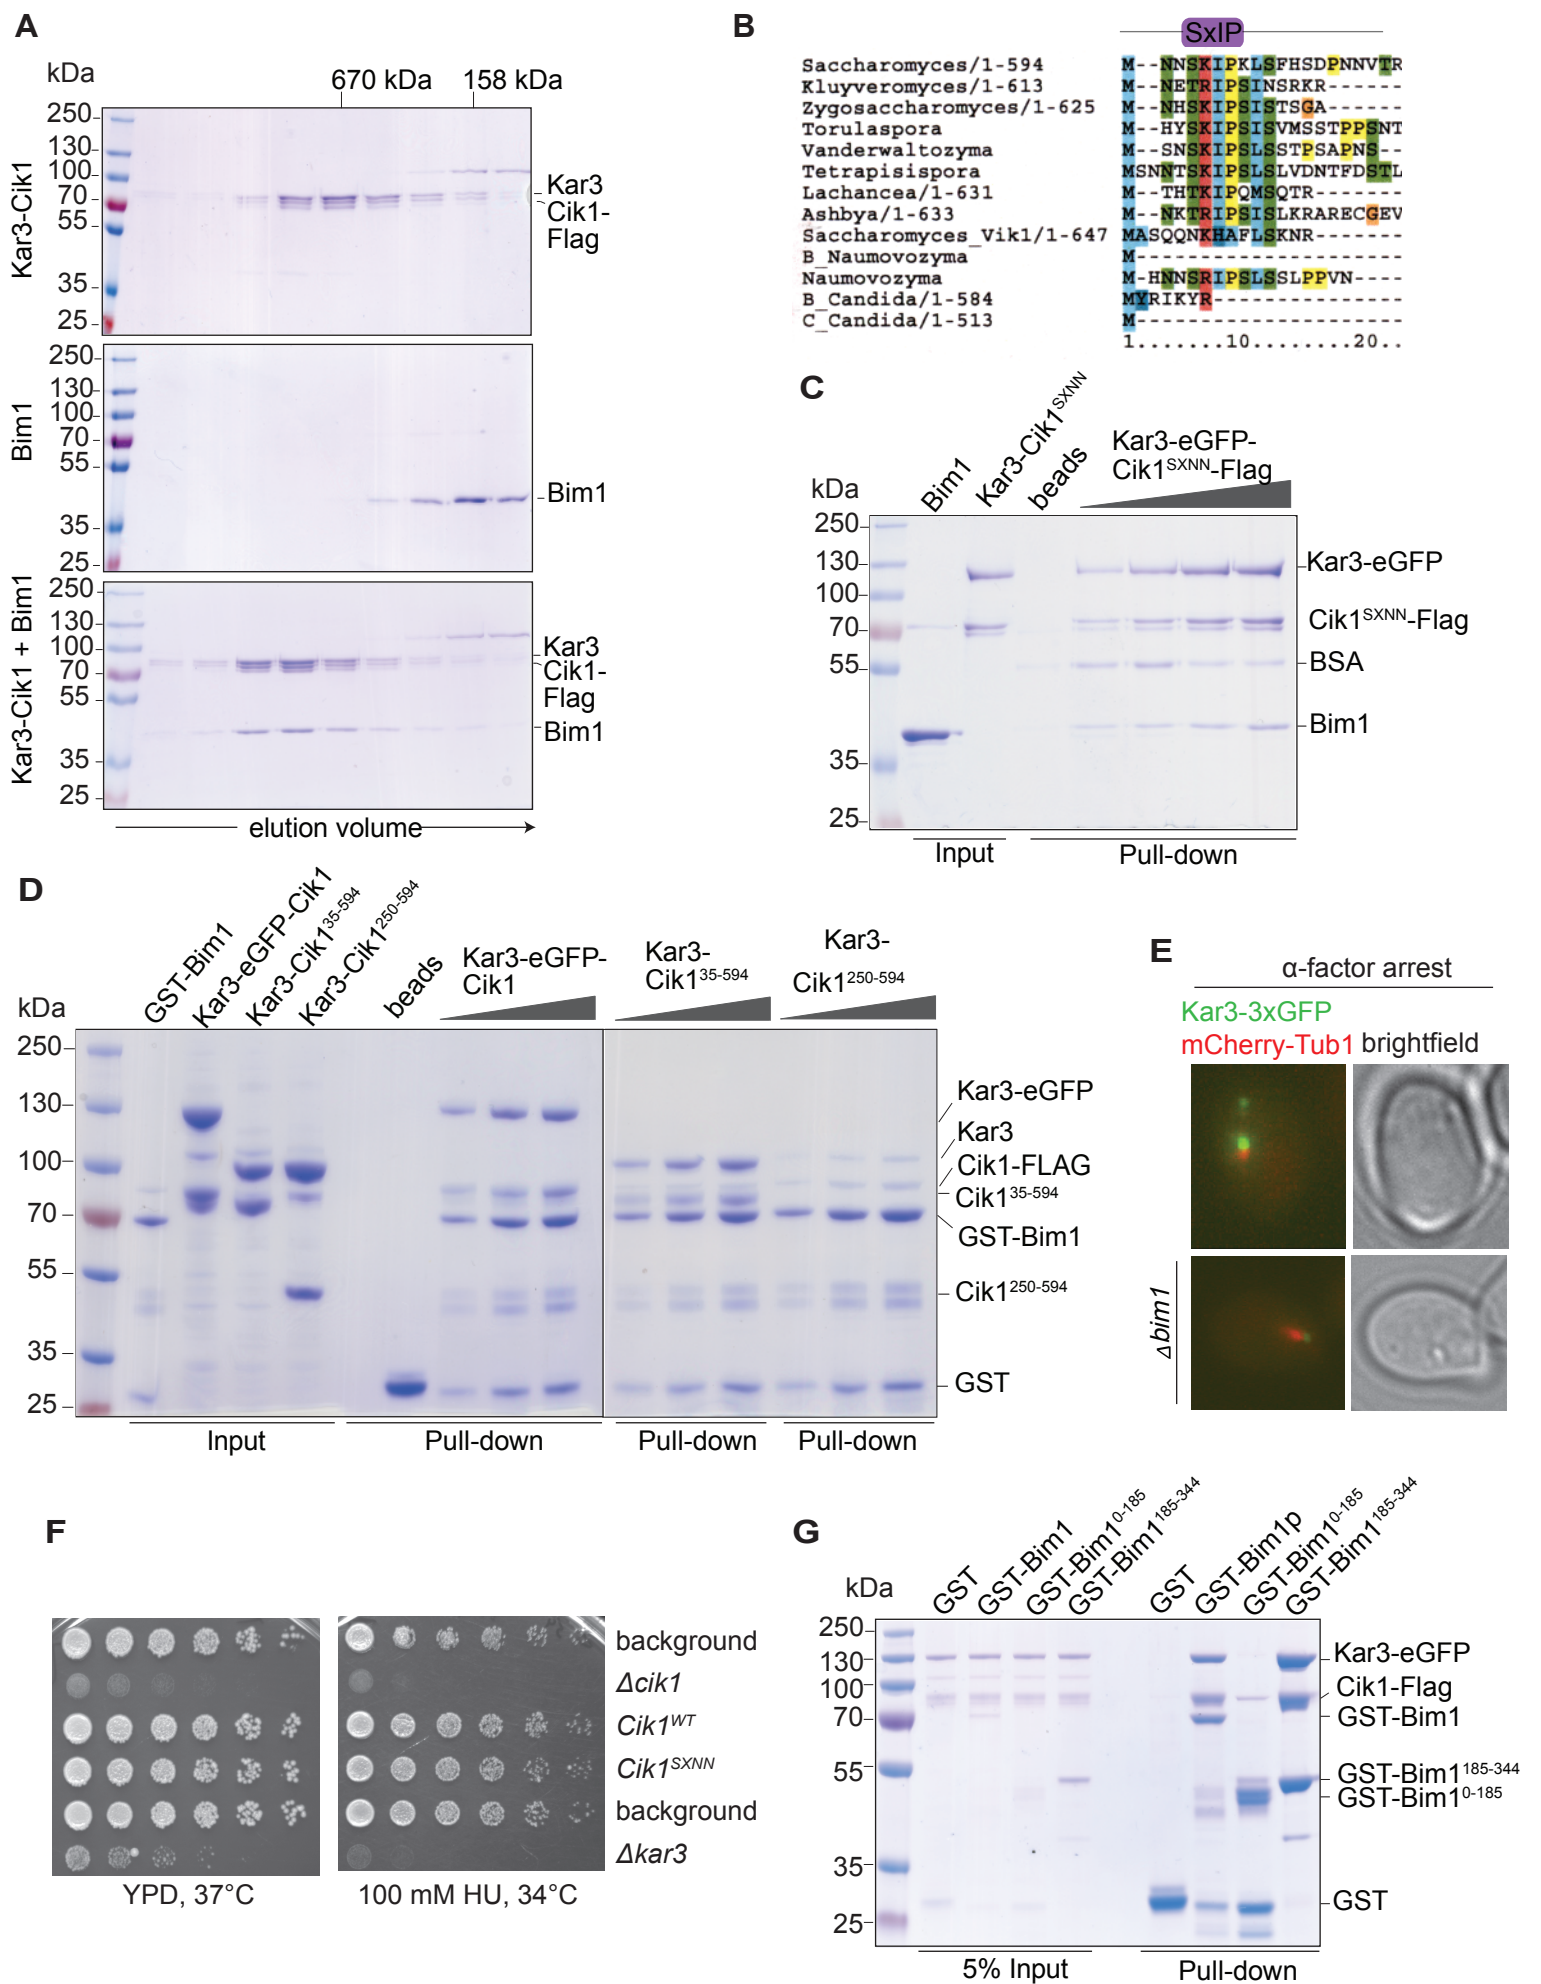

Supplement: supp [file elife-04489-supp-v1.zip]

**Figure 2 - figure supplement 2**

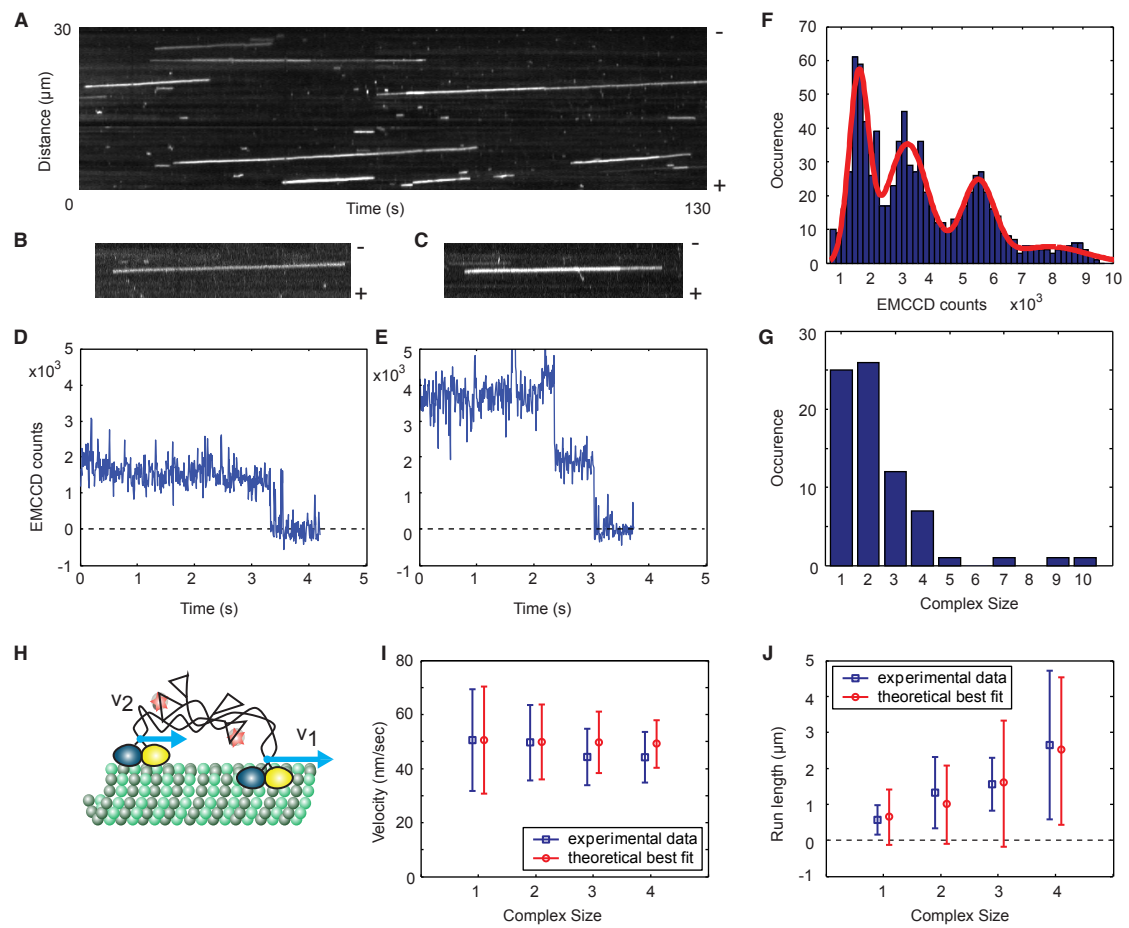

Supplement: supp [file elife-04489-supp-v1.zip]

**Figure 2 - figure supplement 3**

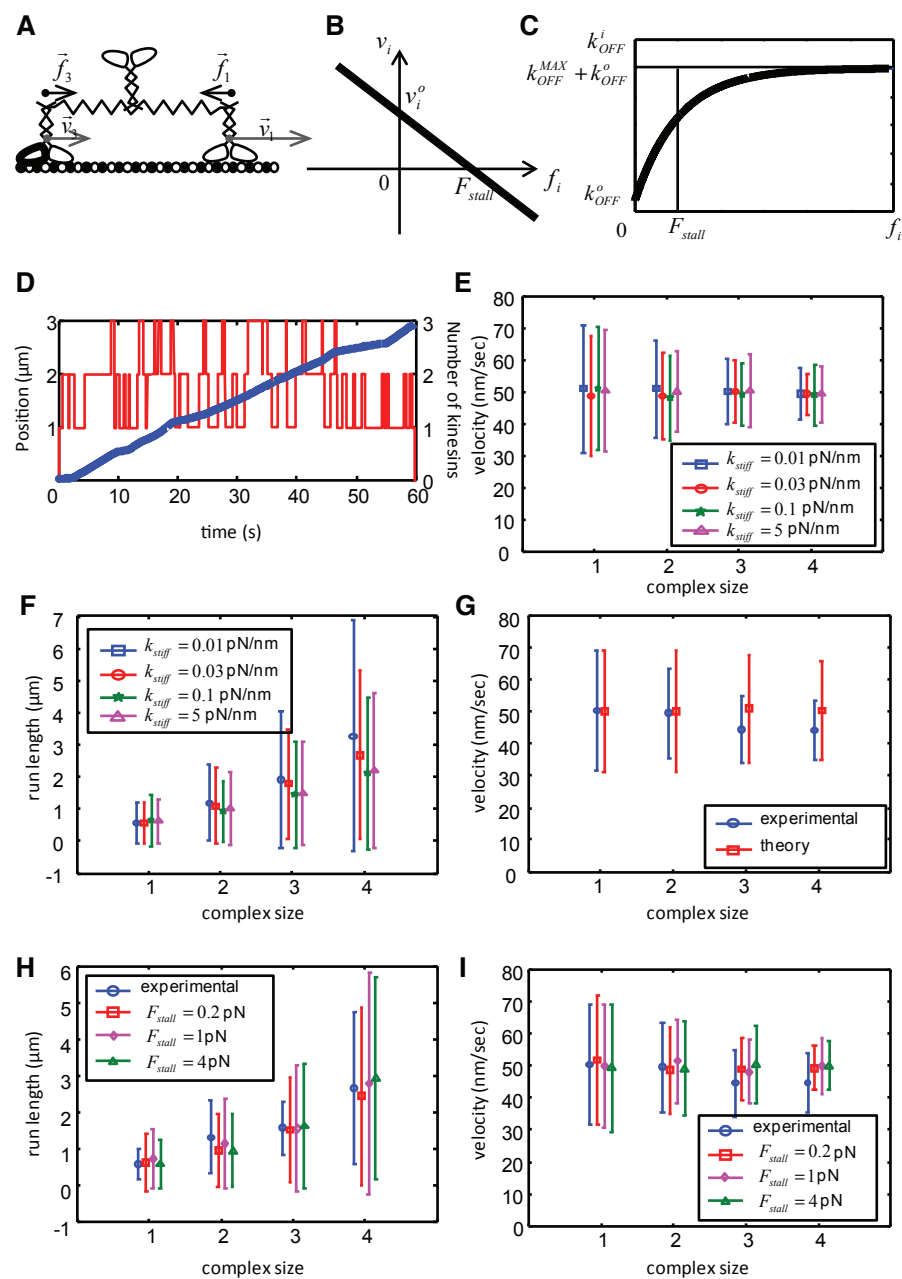

Supplement: supp [file elife-04489-supp-v1.zip]

Figure 7 - figure supplement 1

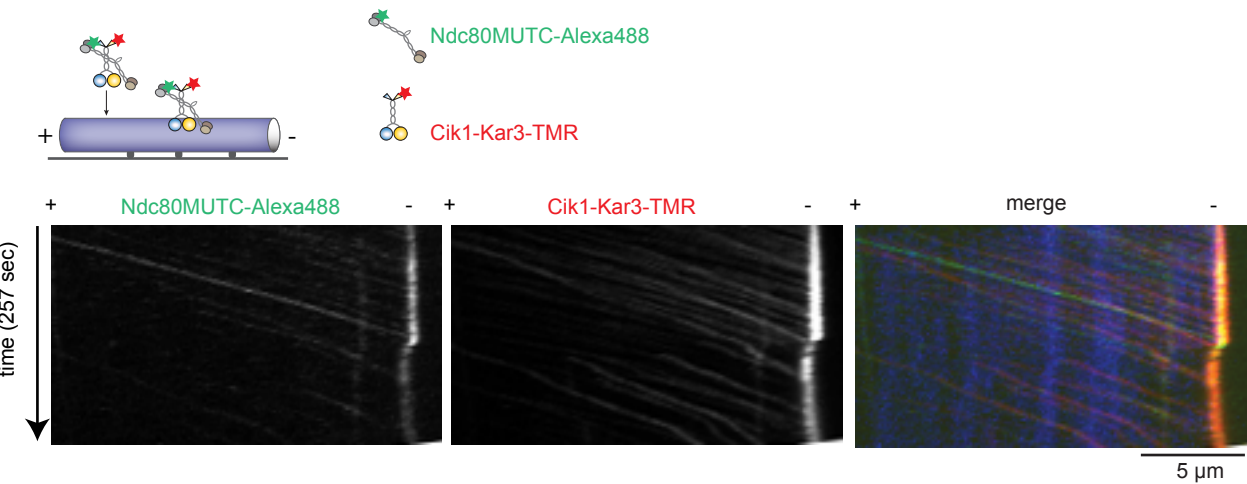

Supplement: supp [file elife-04489-supp-v1.zip]
